# Supplementary material
Source: HighWire-hosted journal article supplement (https://bmjopengastro.bmj.com/highwire/filestream/1987/field_highwire_adjunct_files/0/bmjgast-2020-000558supp001_data_supplement.pdf)
Supplement: bmjgast-2020-000558supp001_data_supplement.pdf [file bmjgast-2020-000558supp001_data_supplement.pdf]

**GENERAL INFORMATION****1.- What is your gender?**

Male

Female

**2.- How old are you?****3.- What is your Latin American country of current residence?****4.- What is your height in centimeters?****5.- What is your weight in kilograms?****6.- What is your academic formation?**

Internal medicine / gastroenterology

Surgery

Other

**7.- Do you suffer from any of the following diseases? (you can mark more than one)**

Hypertension

Diabetes

Chronic Obstructive Pulmonary Disease

Obesity

Moderate or severe Asthma

Any Cardiopathy

Autoimmune disease

Immunosuppressive therapy

Cirrhosis

Cancer

None of them

**8.- In which sector do you carry out your functions as an endoscopist?**

Private

Public

Both

**9.- How long have you had changes in the way you work in your endoscopy service due to coronavirus-associated disease (COVID-19)?**

< 2 weeks

Between 2 to 4 weeks

Between 4 to 8 weeks

> 8 weeks

**10. In the unit where you perform most of your procedures, were you informed of the service plan for patient care during the coronavirus pandemic?**

Yes

No

**11.- In case of working in the public sector, have work teams been set up to avoid a simultaneous contagion from all those who make up the workforce?**

Yes

No

Do not apply

**12.- In the unit where you practice most of your procedures, are there patients hospitalized with coronavirus-associated disease (COVID-19)?**

Yes

No

Do not apply

**13.-In the unit where you practice most of your procedures, have you or any endoscopist contracted coronavirus-associated disease (COVID-19) secondary to any contact with a patient from the center itself?**

I have contracted COVID-19

An endoscopist from the unit has contracted COVID-19

More than one endoscopist in the unit has contracted COVID-19

No endoscopist in the unit has contracted COVID-19

I don't know

**14.- Regarding endoscopic procedures in patients with high suspicion or confirmed with COVID-19: do you consider that you adhere to the current recommendations?**

< 25% of the time

Between 25-50% of the time

Between 50 – 75% of the time

>75% of the time

I have not attended for a high-risk or confirmed COVID-19 patient

**15.- Regarding endoscopic procedures in patients with high suspicion or confirmed with COVID-19: do you consider that you receive the necessary support from your institution?**

< 25% of the time

Between 25-50% of the time

Between 50 – 75% of the time

>75% of the time

I have not attended for a high-risk or confirmed COVID-19 patient

**16.-In relation to endoscopic procedures and COVID-19: where have you mostly obtained information on care and recommendations? (you can select more than one option)**

Internet

TV / Newspaper

Medical Journals

Webinar / On-line Sessions

**17. Are you afraid of acquiring coronavirus-associated disease (COVID-19) by conducting endoscopic studies?**

A lot

Regular

Little bit

None

#### **PRE-PROCEDURE ASPECTS**

**1.- In the hospital where you perform most of your endoscopic procedures, is a telephone evaluation carried out the day before to assess patient-risk for coronavirus-associated disease (COVID-19)?**

Yes

No

I don't know

**2- In the area where you perform most of your procedures, is there a specific area of respiratory triage for patients?**

Yes

No

I don't know

**3. In the area where you perform most of your procedures, is respiratory triage performed for the medical personnel?**

Yes

No

I don't know

**4. In outpatient care, is the patient invited to wash their hands with soap and water for at least 20 seconds?**

< 25% of the time

Between 25-50% of the time

Between 50 – 75% of the time

>75% of the time

Do not apply

**5. Are three-layer (surgical) facemasks provided to all patients undergoing an endoscopic procedure?**

< 25% of the time

Between 25-50% of the time

Between 50 – 75% of the time

>75% of the time

Do not apply

**6. In the unit where you practice most of your procedures, is temperature taken to patients prior to performing the procedure?**

Yes

No

I don't know

**7. Where you do most of your endoscopic procedures, is there a specific area to put on / take off PPE?**

Yes

No

**8. In the unit where you perform most of your endoscopic procedures, did you receive specific training to put on / take off PPE?**

Yes

No

**9. In the unit where you perform most of your procedures, is there a transportation protocol to the endoscopy room in a confirmed or highly suspected COVID-19 patient?**

Yes

No

I don't know

#### **INTRAPROCEDURE ASPECTS**

**1. What endoscopic procedure do you consider to be risky for aerosol generation?**

Gastroscopy

Duodenoscopy

Colonoscopy

Just gastroscopy and duodenoscopy

All of the above

**2.- In the area where you carry out most of your procedures, have those elective procedures not sensitive to time been deferred?**

Yes, only emergencies and time sensitive procedures are performed

No, workload is normal

Up to doctor discretion

**3.-Which disease or procedures do you consider urgent or not postponable during the current coronavirus pandemic, and therefore should it be carried out? (you can mark more than one)**

Acute Lower gastrointestinal bleeding

Continuing variceal band ligation protocol

Symptomatic benign esophageal stricture

Upper endoscopy for dyspepsia associated with weight loss or anemia

PEG / PEJ / NJ tube

Endoscopic treatment for polyp >1cm.

Jaundice secondary to choledocholithiasis

Jaundice secondary to malignant non-resectable disease

Jaundice secondary to malignant resectable disease

Colonoscopy for melena after negative upper endoscopy

Capsule for evaluation of suspected small bowel bleeding

Enteroscopy for bleeding evaluation of suspected small bower bleeding

Endoscopic ultrasound for solid tumor tissue acquisition

Endoscopic ultrasound Pseudocyst or Walled off necrosis drainage

**4. In performing endoscopic procedures for patients with high suspicion or confirmed with COVID-19, would you prefer that they be performed with the intubated patient?**

Yes

No

It is contraindicated

Each case is individualized

**5.-In the area where you perform most of your procedures, is there a potentially useful negative pressure room for studies in patients with coronavirus-associated disease (COVID-19)?**

Yes

No

I don't know

**6. During gastroscopy and duodenoscopy, do you use a high efficiency respirator (N95 or higher)?**

< 25% of the time

Between 25-50% of the time

Between 50 – 75% of the time

>75% of the time

**7. What personal protective equipment do you use in patients with high suspicion or confirmed diagnosis of SARS COV-2 coronavirus-associated disease (COVID-19)? (you can mark more than one)**

Disposable hairnet

Water proof gown

N95 respirator or higher

Goggle

Face Shield

Two pair of gloves

Booties / shoe covers

**8. During colonoscopy, do you use a high efficiency respirator (N95 or higher)?**

< 25% of the time

Between 25-50% of the time

Between 50 – 75% of the time

>75% of the time

**9. Have you had to perform any procedures without the recommended complete personal protective equipment in the last 4 weeks?**

Yes

No

**10. From the following list, are there any components of personal protective equipment that are not provided by the institution where you carry out most of its procedures? (You can choose more than one option)**

Disposable hairnet

Water proof gown

N95 respirator or higher

Goggle

Face Shield

Two pair of gloves

Booties / shoe covers

None, all the personal protection equipment components are provided by the endoscopy department

**11. If the previous answer has been positive, in what percentage of the occasions do you put the personal protective equipment for your procedures?**

25% of the time

Between 25-50% of the time

Between 50 – 75% of the time

>75% of the time

Do not apply

#### **POST PROCEDURE ASPECTS**

**1. In the unit where you perform most of your endoscopic procedures, is the room disinfected with a viricidal agent after each procedure?**

25% of the time

Between 25-50% of the time

Between 50 – 75% of the time

>75% of the time

I don't know

**2. In the unit where you practice most of your procedures, is telephone follow-up performed 7 or 14 days after the procedure is performed?**

25% of the time

Between 25-50% of the time

Between 50 – 75% of the time

>75% of the time

I don't know

**3. Have you had to reuse material from personal protective equipment in the last 4 weeks?**

Yes

No

**4. If you answered yes, what material from your personal protective equipment did you have to reuse? (you can choose more than one option)**

Disposable hairnet

Water proof gown

N95 respirator or higher

Goggle

Face Shield

Two pair of gloves

Booties / shoe covers

I have not reused personal protective equipment

**5. If you have reused a high efficiency respirator (N95 or higher), is it submitted to a standardized decontamination process?**

Yes

No

I have not reused personal protective equipment

**6. In case of reusing a high efficiency respirator (N95 or higher), what decontamination process is done?**

Oven heat (> 70 degrees celsius)

Ultraviolet light

Vaporized hydrogen peroxide

Time (not using it for more than 72 hours)

I do not know what decontamination process is done

It is reused without any decontamination process

I have not reused personal protective equipment
